# Supplementary figures and images for: The increased oxygen content in tantalum leads to decreased bioactivity and osteogenic ability of tantalum implants
Source: Royal Society of Chemistry journal article supplement (doi:10.1039/d0bm01555e), 2020-12-11

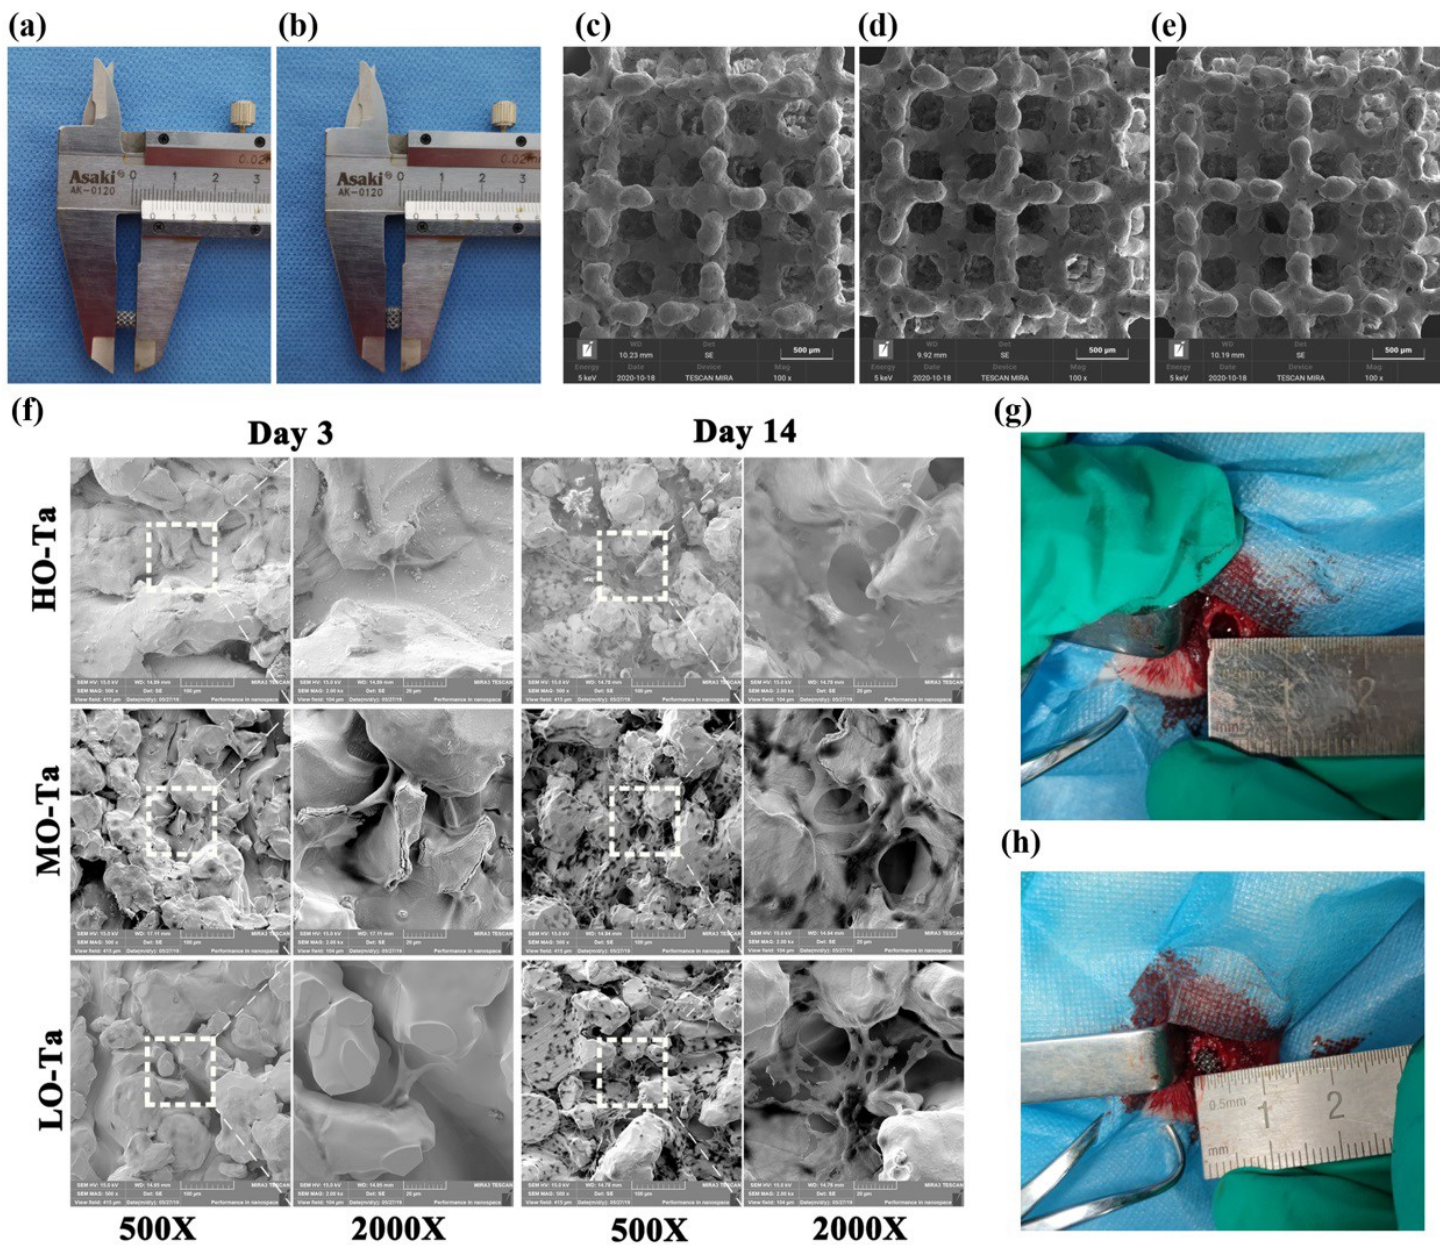

Supplement: d0bm01555e2.pdf [file d0bm01555e2.pdf]

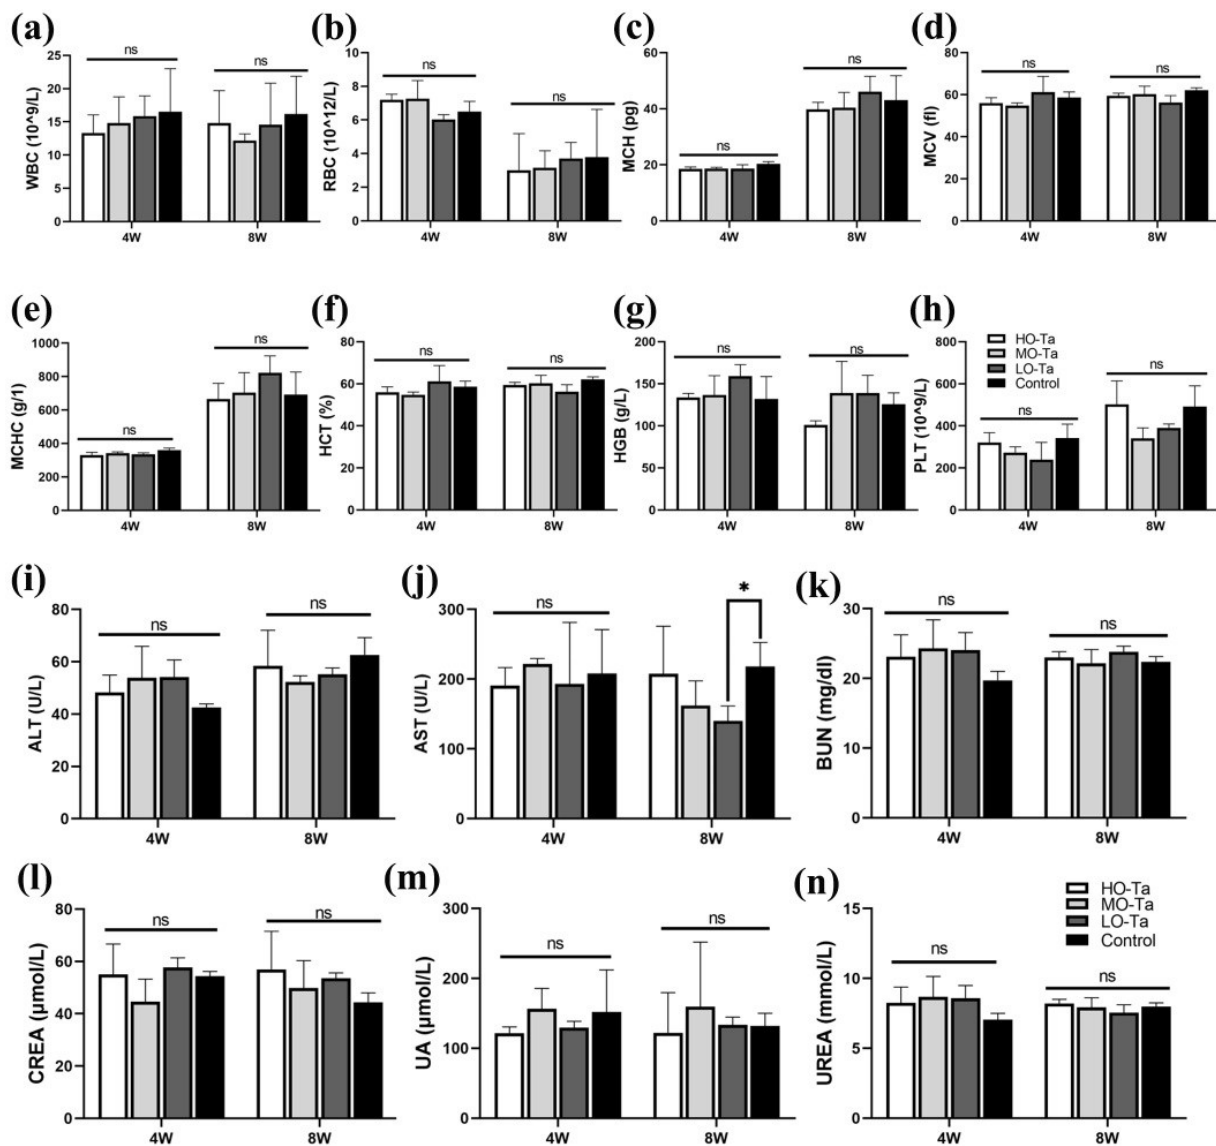

Supplement: d0bm01555e3.pdf [file d0bm01555e3.pdf]

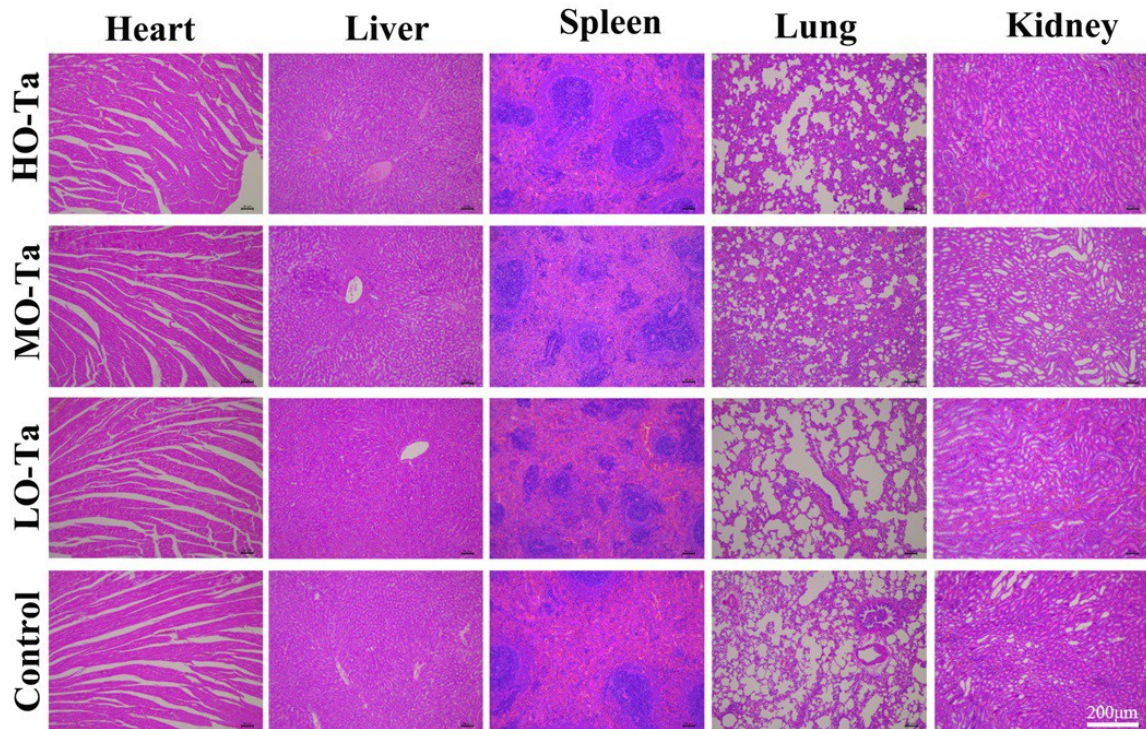

Supplement: d0bm01555e4.pdf [file d0bm01555e4.pdf]
